# Supplementary material for: Risk factors for mental illness in adults with atopic eczema or psoriasis: protocol for a systematic review
Source: PubMed Central journal article supplement (PMC7772326; doi:10.1136/bmjopen-2020-038324), 2020-12-28
Supplement: bmjopen-2020-038324supp001.pdf [file bmjopen-2020-038324supp001.pdf]

## Supplementary Material

**Supplementary Table 1: Search strategy in MEDLINE database**

| Item number                                                  | Searches                                                                                                                                                                               |
|--------------------------------------------------------------|----------------------------------------------------------------------------------------------------------------------------------------------------------------------------------------|
| <u>Risk factor terms</u>                                     |                                                                                                                                                                                        |
| 1                                                            | risk OR risk factor* OR protective factor OR predict* OR correlat* OR associate* OR aetiol* OR etiol* OR relationship OR mediat* OR mechanism* OR caus* OR path*                       |
| 2                                                            | exp Risk/                                                                                                                                                                              |
| 3                                                            | 1 OR 2                                                                                                                                                                                 |
| <u>Atopic eczema terms</u>                                   |                                                                                                                                                                                        |
| 4                                                            | atopic dermatitis OR atopic eczema OR atopy                                                                                                                                            |
| 5                                                            | Dermatitis, Atopic/                                                                                                                                                                    |
| 6                                                            | exp Eczema/                                                                                                                                                                            |
| 7                                                            | 4 OR 5 OR 6                                                                                                                                                                            |
| <u>Psoriasis terms</u>                                       |                                                                                                                                                                                        |
| 8                                                            | psoriasis OR psoria*                                                                                                                                                                   |
| 9                                                            | pustulo* AND (palmopl* OR palmari* OR palmar)                                                                                                                                          |
| 10                                                           | exp Psoriasis/                                                                                                                                                                         |
| 11                                                           | 8 OR 9 OR 10                                                                                                                                                                           |
| <u>Combining atopic eczema and psoriasis terms with 'OR'</u> |                                                                                                                                                                                        |
| 12                                                           | 7 OR 11                                                                                                                                                                                |
| <u>Mental illness terms</u>                                  |                                                                                                                                                                                        |
| 13                                                           | mental health OR mental* ill* OR mental disorder* OR affective OR ansi* OR depress* OR phobi* OR panic OR bipolar* OR schizo* OR schizophrenia OR delusion* OR psychotic* OR psychos#s |
| 14                                                           | psychiatr* AND (ill* OR disorder OR disease*)                                                                                                                                          |
| 15                                                           | psychological* AND (ill* OR disorder OR disease* OR distress)                                                                                                                          |
| 16                                                           | Mental Health/                                                                                                                                                                         |
| 17                                                           | Exp Mental Disorders/                                                                                                                                                                  |
| 18                                                           | 13 OR 14 OR 15 OR 16 OR 17                                                                                                                                                             |
| <u>Combining key concepts with 'AND'</u>                     |                                                                                                                                                                                        |
| 19                                                           | 3 AND 12 AND 18                                                                                                                                                                        |
